# Supplementary material for: IL6 Gene Promoter Polymorphisms and Type 2 Diabetes
Source: Oxford University Press journal article supplement (doi:10.2337/db06-0600), 2006-09-26
Supplement: pg2915onlineappendix.doc [file pg2915onlineappendix.doc]

**Online Appendix to:**

***IL6* Promoter Polymorphisms and Type 2 Diabetes Mellitus:
Joint Analysis of Individual Participants’ Data from 21 Studies**

**Research Design and Methods**

*Search Strategy, Study Recruitment, and Data Collection*

Published studies were identified in the PUBMED database using the following search terms: (IL-6 OR IL6 OR interleukin-6) AND (diabetes OR T2DM OR NIDDM) AND (gene OR genes OR genet* OR polymorphism* OR allele*). To further extend the search, the reference lists from all identified original studies and review articles on this topic were examined. Unpublished studies were recruited by a call for participation at the symposium "Immunogenetic Contribution to Type 2 Diabetes and Parameters of the Metabolic Syndrome", which was held in September 2004 at the 40th Annual Meeting of the European Association for the Study of Diabetes, and by personally contacting investigators in the field.

All participating studies have been conducted according to the principles expressed in the Declaration of Helsinki. Individual studies had either written informed consent for all participants for genetic analyses or approval from their institutional review board for genetic analyses.

Data were collected on the *IL6* variants -174G>C or -573G>C, T2DM status, age and sex (required). Body mass index (BMI), ethnicity, familial relationships, and plasma glucose values were gathered where available.

*Data Cleaning and Genotyping Methods*

The study center at GSF checked all incoming data for plausibility and for consistency with information provided by the investigators or the published article. Plausible and corrected data were converted into a standard format and incorporated into a central database.

A questionnaire was sent to all principal investigators to collect data on genotyping methods and quality. This information is summarized in table A1. As both variants are G/C-polymorphisms and allele G is complementary to allele C, the genotyping sequences and strands, assessed via the questionnaire, were compared with a reference to confirm that the allele labeling was performed consistently across all studies.

**Table A1 – online appendix**

**Methods used for genotyping the *IL6* promoter polymorphisms -174G>C and -573G>C**

| **Study Name** | **Genotyping Method** | **Call Ratea  -174 [%]** | **Call Ratea  -573 [%]** |
| --- | --- | --- | --- |
| Botnia Study | Allelic discrimination assay-by-design method on ABI 7900  (Applied Biosystems) | 100 | 100 |
| Captopril Prevention Project | Dynamic allele specific hybridization (DASH) | 100 | 98 |
| Danish Study | Chip-based MALDI-TOF MS  (MassArray, Sequenom) | 96 | 95 |
| Ealing Diabetes Study of  Coagulation | Nla III RFLP, MADGE | 97 | n.a.b |
| European Prospective Investigation into Cancer and Nutrition Potsdam | SNuPE, MegaBACE 1000 | 100 | n.a. |
| The Finland-United States Investigation of NIDDM Genetics | Illumina GoldenGate | 98 | n.a. |
| Girona Genetics of Diabetes Study | SfaNI RFLP | 99 | n.a. |
| Greek Study | PCR with sequence specific primers, cytokine genotyping kit  (One Lambda, USA.) | 99 | n.a. |
| KORA MIc Family Study | Hsp92II RFLP, PAGE | 97 | n.a. |
| KORA Survey S4 | Chip-based MALDI-TOF MS  (MassArray, Sequenom) | 97 | 97 |
| KORA T2DM Family Study | Chip-based MALDI-TOF MS  (MassArray, Sequenom) | 98 | 97 |
| MONICA/KORA Case Cohort Study S123 | Chip-based MALDI-TOF MS  (MassArray, Sequenom) | 99 | 99 |
| MONICA/KORA Survey S3 | Chip-based MALDI-TOF MS  (MassArray, Sequenom) | 99 | 99 |
| Regensburg MI Family Study | Hsp92II RFLP, PAGE | 97 | n.a. |
| Second Northwick Park Heart Study | PCR by MADGE, NIaIII RFLP  (*IL6* -174G>C), MblI RFLP (*IL6* ‑573G>C) | 99 | 98 |
| Tarraco Study | SfaNI RFLP | 99 | n.a. |
| T2DM Susceptibility in Pima Indians Study | Pyrosequencing | 97 | n.a. |
| University College Diabetes and Cardiovascular Study | PCR by MADGE, NIaIII RFLP  (*IL6* -174), MblI RFLP (*IL6* ‑573G>C) | 99 | 98 |

**a** Successfully genotyped individuals in percent of all subjects intended for genotyping

b Not applicable

c Myocardial infarction

**Table A2 – online appendix**

**Characteristics of included study** participants

| **Study Namea** | **Sta-tusb** | **Diagnosisc** | **No.d** | **% Male** | **Mean ±  Standard Error** | | ***IL6* -174G>C** | | | ***IL6* -573G>C** | | |
| --- | --- | --- | --- | --- | --- | --- | --- | --- | --- | --- | --- | --- |
| **Age [years]** | **BMI [kg/m²]** | **% GC** | **% CC** | **P HWEe** | **% GC** | **% CC** | **P HWEe** |
| BOTNIA_CC | 1 | 4, 10 | 760 | 53 | 60 ± 10 | 29 ± 5 | 52 | 25 | 0.18 | 5 | 0.1 | 0.41 |
| 2 | 2, 3, 5, 7 | 539 | 48 | 53 ± 12 | 26 ± 4 | 54 | 25 | 0.08 | 6 | 0.4 | 0.13 |
| CAPPP_CC | 1 | 5, 7, 10 | 45 | 80 | 58 ± 5 | 30 ± 4 | 47 | 24 | 0.76 | 9 | 0.0 | 1.00 |
| 2 | 4 | 414 | 71 | 58 ± 6 | 27 ± 4 | 46 | 24 | 0.12 | 9 | 0.7 | 0.10 |
| DANISH_CC | 1 | 3, 4, 5, 6, 10 | 1094 | 63 | 52 ± 8 | 30 ± 6 | 46 | 24 | 0.02 | 10 | 0.4 | 0.54 |
| 2 | 5, 7 | 4507 | 46 | 45 ± 8 | 26 ± 4 | 48 | 23 | 0.06 | 7 | 0.5 | 0.0001 |
| EDSC_CC | 1 | 3, 4, 10 | 85 | 100 | 55 ± 6 | 30 ± 6 | 58 | 19 | 0.20 | . | . | . |
| 2 | 1 | 1326 | 100 | 56 ± 3 | 26 ± 3 | 50 | 18 | 0.34 | . | . | . |
| EPIC-POTSDAM _CC | 1 | 4 | 175 | 58 | 55 ± 7 | 31 ± 5 | 55 | 17 | 0.12 | . | . | . |
| 2 | 1, 2 | 349 | 58 | 55 ± 7 | 27 ± 4 | 55 | 18 | 0.053 | . | . | . |
| FUSION_CC | 1 | 3, 4, 5, 6, 10 | 506 | 54 | 63 ± 7 | 30 ± 5 | 47 | 30 | 0.18 | . | . | . |
| 2 | 2, 3, 5, 7 | 353 | 41 | 66 ± 6 | 27 ± 4 | 50 | 30 | 0.92 | . | . | . |
| FUSION_DS | 1 | 3, 4, 5, 6, 10 | 227 | 58 | 64 ± 9 | 30 ± 5 | 50 | 24 | 0.79 | . | . | . |
| 2 | 2, 3, 5, 7 | 132 | 35 | 58 ± 9 | 27 ± 4 | 49 | 28 | 0.86 | . | . | . |
| GIRONA_CC | 1 | 5, 6, 10 | 43 | 77 | 53 ± 10 | 31 ± 5 | 51 | 9 | 0.52 | . | . | . |
| 2 | 5, 7 | 67 | 84 | 47 ± 9 | 26 ± 3 | 48 | 27 | 0.81 | . | . | . |
| GREEK_CC | 1 | 3, 4, 10 | 30 | 23 | 57 ± 8 | 28 ± 4 | 33 | 10 | 0.38 | . | . | . |
| 2 | 1, 2, 3 | 37 | 62 | 52 ± 9 | n.a.f | 27 | 8 | 0.32 | . | . | . |
| KORA-MIFAM_CC | 1 | 1, 3, 8 | 66 | 88 | 58 ± 6 | 30 ± 5 | 50 | 12 | 0.79 | . | . | . |
| 2 | 1, 2, 8 | 417 | 73 | 58 ± 6 | 28 ± 4 | 47 | 18 | 0.61 | . | . | . |
| KORA-MIFAM_DS | 1 | 1, 3, 8 | 27 | 78 | 59 ± 6 | 30 ± 4 | 51 | 18 | 1.00 | . | . | . |
| 2 | 1, 2, 8 | 39 | 46 | 61 ± 6 | 28 ± 4 | 58 | 11 | 0.31 | . | . | . |
| KORA-S4_CC | 1 | 2, 3, 5, 6, 10 | 230 | 59 | 65 ± 5 | 31 ± 5 | 54 | 15 | 0.13 | 13 | 0.0 | 0.60 |
| 2 | 1, 2, 5, 7 | 460 | 47 | 63 ± 5 | 28 ± 4 | 53 | 20 | 0.19 | 9 | 0.7 | 0.11 |
| KORA-T2DMFAM_CC | 1 | 2, 3, 5, 6, 10 | 335 | 60 | 61 ± 8 | 31 ± 5 | 50 | 17 | 0.82 | 13 | 0.3 | 1.00 |
| 2 | 1, 2, 5, 7 | 421 | 48 | 64 ± 6 | 28 ± 4 | 52 | 16 | 0.19 | 9 | 0.2 | 0.61 |
| KORA-T2DMFAM_DS | 1 | 2, 3, 5, 6, 10 | 344 | 59 | 60 ± 10 | 31 ± 5 | 53 | 16 | 0.08 | 9 | 0.0 | 1.00 |
| 2 | 1, 2, 5, 7 | 358 | 40 | 58 ± 10 | 27 ± 4 | 53 | 16 | 0.10 | 11 | 0.3 | 1.00 |
| MONICA/KORA-COHORT_CC | 1 | 2, 10 | 488 | 62 | 64 ± 9 | 30 ± 4 | 48 | 18 | 0.78 | 10 | 0.2 | 1.00 |
| 2 | 1 | 1585 | 53 | 63 ± 10 | 27 ± 4 | 50 | 16 | 0.37 | 12 | 0.3 | 0.83 |
| MONICA-S3_CC | 1 | 2, 3, 8, 10 | 156 | 58 | 63 ± 8 | 30 ± 5 | 45 | 22 | 0.33 | 11 | 1.3 | 0.14 |
| 2 | 1, 2, 8 | 3186 | 51 | 50 ± 13 | 27 ± 4 | 50 | 19 | 0.24 | 11 | 0.3 | 1.00 |
| PIMA_DS | 1 | 5, 6, 11 | 62 | 35 | 35 ± 12 | 38 ± 9 | 7 | 0 | 1.00 | . | . | . |
| 2 | 3, 4, 6 | 79 | 44 | 34 ± 13 | 35 ± 10 | 9 | 0 | 1.00 | . | . | . |
| RMIFAM_CC | 1 | 1, 9 | 280 | 64 | 64 ± 9 | 28 ± 4 | 50 | 15 | 0.54 | . | . | . |
| 2 | 1, 9 | 983 | 61 | 62 ± 9 | 27 ± 4 | 47 | 20 | 0.13 | . | . | . |
| RMIFAM_DS | 1 | 1, 9 | 412 | 69 | 60 ± 7 | 28 ± 4 | 52 | 17 | 0.19 | . | . | . |
| 2 | 1, 9 | 538 | 61 | 61 ± 8 | 27 ± 3 | 43 | 18 | 0.02g | . | . | . |
| TGN_CC | 1 | 1, 4 | 156 | 37 | 59 ± 9 | 29 ± 5 | 49 | 9 | 0.22 | . | . | . |
| 2 | 1, 3, 5, 7 | 53 | 43 | 50 ± 12 | 30 ± 4 | 62 | 8 | 0.04 | . | . | . |
| UDACS_CC | 1 | 4, 10 | 133 | 100 | 57 ± 5 | 31 ± 5 | 48 | 12 | 0.85 | 12 | 0.8 | 0.45 |
| 2 | 1 | 1326h | 100 | 56 ± 3 | 26 ± 3 | 49 | 19 | 1.00 | 9h | 0.2h | 1.00h |

a Study name, used in this publication.; _CC = case-control study, _DS = discordant-sib study

b Case-control status within this study: 1 = Type 2 diabetes mellitus (T2DM) cases, 2 = non-diabetic controls

c Type of T2DM-diagnosis for cases: 1 = interview question; 2 = interview question with diabetes confirmation by doctor; 3 = diabetes medication; 4 = doctor diagnosis; 5 = fasting plasma glucose ≥ 7.0 mmol/l; 6 = oral glucose tolerance test with 2-hour plasma glucose ≥ 11.1 mmol/l (WHO-OGTT); 7 = WHO-OGTT in some participants to confirm diagnosis; 8 = random plasma glucose ≥ 11.1 mmol/l; 9 = HbA1c ≥ 6.2%; 10 = exclusion of subjects with type 1 diabetes; 11 = type 1 diabetes is virtually non-existent in PIMA Indians

Type of “No T2DM”-diagnosis for controls: 1 = interview question; 2 = no diabetes medication; 3 = doctor diagnosis; 4 = fasting plasma glucose (FPG) < 7.0 mmol/l; 5 = FPG < 6.1 mmol/l; 6 = oral glucose tolerance test (OGTT) with 2-hour plasma glucose < 11.1 mmol/l; 7 = OGTT with 2-hour plasma glucose < 7.8 mmol/l; 8 = random plasma glucose < 11.1 mmol/l; 9 = HbA1c < 6.2%

d Number of individuals included in age- and sex-adjusted analyses for *IL6* -174G>C and / or *IL6* -573G>C

e P-value of exact test for Hardy-Weinberg equilibrium (HWE), using 10,000 Monte Carlo permutations

f Not applicable

g The P-value remains 0.02 when including only one randomly drawn control per family
h *IL6* -573G>C was not genotyped in the Ealing Diabetes Study of Coagulation. Thus, for the -573G>C analysis, the complete Second Northwick Park Heart Study (n = 2652) was used as control group for UDACS_CC

**Table A3 – online appendix**

**Short description of included studies**

| **Study Name  (official  abbreviation)** | **Study Description** a |
| --- | --- |
| Botnia Study | The Botnia Study began in 1990 as a family-based study aiming to identify genes increasing susceptibility to T2DM. Subjects with T2DM from the area of five health care centres in the Botnia region of Western Finland were invited to participate together with their family members.  For the purpose of this joint analysis, unrelated individuals were genotyped for the two *IL6*-variants -174G>C and -573G>C. According to a priori defined criteria, one T2DM individual per family was selected. Controls comprise cases’ spouses and unrelated controls, all being 35 years or older. |
| Captopril  Prevention Project (CAPPP) | CAPPP is a prospective randomized clinical trial conducted in Sweden and Finland during the 1990s. Patients aged 25–66 years, with a measured diastolic blood pressure of 100 mmHg or more on two occasions, were recruited at health centers and randomly assigned to captopril or conventional antihypertensive treatment. Exclusion criteria were secondary hypertension, serum creatinine concentration of more than 150 μmol/l and disorders that required treatment with ß-blockers. Cases had T2DM at baseline or were diagnosed during the follow-up.  This joint analysis includes a substudy of the Swedish part of CAPPP, which has been genotyped for the two *IL6*-variants -174G>C and -573G>C. This substudy comprises all patients that got myocardial infarction, plus two controls per case, matched with respect to gender, age and smoking. Further details: (1). |
| Danish Study | The DANISH case-control study of T2DM involves all 4,568 subjects with normal glucose tolerance (NGT) from the Inter99 cohort as controls and 1,389 unrelated T2DM patients recruited from the outpatient clinic at Steno Diabetes Center, Copenhagen and the Research Centre for Prevention and Health through the Inter99 study as cases. The Inter99 cohort is a population-based randomized non-pharmacological intervention study for prevention of cardiovascular disease done at the Research Centre for Prevention and Health involving 6,514 Caucasian subjects (6,164 with data from an oral glucose tolerance test). Further details: (2). |
| Ealing  Diabetes Study of  Coagulation (EDSC) | The subjects of the EDSC study were recruited consecutively from the Ealing Hospital diabetes clinic in London. Patients completed a questionnaire with details of age, ethnicity, smoking habit, fasting status, duration of diabetes, and other clinical details. Blood was collected for plasma and DNA analysis. Several further parameters, such as BMI, were measured. Patients with T2DM (n = 927) comprised primarily three ethnic groups, Indian Asians, n = 503, UK White, n = 331, Black Afro-Caribbean, n = 93. Further details: (3).  As the NPHS II study of healthy male individuals serves as control group, only white male EDSC subjects were included in this joint analysis. |
| European  Prospective Investigation into Cancer and Nutrition (EPIC)  Potsdam | A nested case-control study was designed within the European Prospective Investigation into Cancer and Nutrition (EPIC)-Potsdam cohort, which is part of the European multicenter, population-based EPIC-study including 27,548 subjects from the area around Potsdam, Germany (women aged 35–65 years and men aged 40–65 years). Baseline examination and blood sampling were conducted between 1994 and 1998.  Data presented in this joint analysis is based on the first follow-up questionnaires sent to the study participants on average 2.3 years after baseline examination. Cases were free of T2DM at baseline and developed their incident T2DM during the follow-up. Further details: (4). |

| The Finland-United States Investigation of NIDDM Genetics  (FUSION) | The index probands in the FUSION study were identified primarily from the National Hospital Discharge Registry (NHDR), which includes records since 1970 of all hospitalized patients with diabetes, and from previous studies carried out by the National Public Health Institute in Finland. From the NHDR, all patients who were hospitalized with a diagnosis of T2DM in Finland during 1987–1993 were identified in the first wave of sampling (FUSION 1). In the second wave of sampling (FUSION 2), patients hospitalized with T2DM during 1994–1995 were identified. Potential families for FUSION 2 also included some identified during FUSION 1 but not invited to participate at that time due to distance from the study clinics. An index proband with his family was eligible for participation in the FUSION study if 1) the proband or another affected sibling was diagnosed with T2DM between 35 and 60 years of age, 2) there was no history of type 1 diabetes in first-degree relatives, 3) the proband had one or more living full siblings diagnosed with T2DM at any age, and 4) at least one parent was apparently nondiabetic, with preference given to families with living parents or parents who had lived a long life without known diabetes. Further details on FUSION 1: (5), on FUSION 2: (6).  For the purpose of this joint analysis, the FUSION study was split in two parts. One T2DM individual from each FUSION 1 family was chosen as case for the FUSION_CC study. Controls for the FUSION_CC study include normoglycemic (NGT) spouses of FUSION T2DM individuals, and elderly controls that were all born in 1925 and were NGT by oral glucose tolerance tests (OGTTs) at both, ages 65 and 70. All FUSION 2 sibships discordant for T2DM were included in the FUSION_DS study. |
| --- | --- |
| Girona  Genetics of Diabetes Study | The control subjects of the Girona Genetics of Diabetes Study were unrelated healthy Caucasian middle-aged subjects recruited from the general population. The T2DM patients were consecutively recruited subjects from the diabetes clinics at the Hospital of Girona, Spain. Further details: (7). |
| Greek Study | The diabetic subjects of the Greek study were recruited between the years 1998 and 2001, by screening the records of the diabetes clinic at “Evagelismos” hospital in Athens, and selecting individuals aged between 30 and 60 years with initial diagnosis different from type 1 diabetes mellitus. Since non-obese individuals at the age of 30 or older with good metabolic control on diet or oral hypoglycaemic therapy may initially be misclassified as T2DM patient, although they suffer from Latent Autoimmune Diabetes of Adults (LADA), the subjects were checked for the presence of serum antibodies against glutamic acid decarboxylase (GAD65), since these antibodies represent a specific marker for the presence of LADA diabetes. Finally, these patients were stratified into two groups: patients with latent autoimmune diabetes of adults (LADA) and patients with T2DM. Patients with negative GAD65 antibodies were used as T2DM cases in this joint analysis. Blood was collected for plasma and DNA analysis. Several other clinical and immunological parameters, such as BMI, C-peptide levels, cytokines intracellular and serum levels, were also measured. Healthy individuals without clinical and laboratory evidence and without family history of diabetes served as controls and were used in this joint analysis. Further details: (8). |

| KORA Studies  in  chronological order | KORA (Cooperative Health Research in the Region Augsburg) is a regional research platform in the German city of Augsburg and the two adjacent counties, for population-based studies, subsequent follow-up studies and family studies in the fields of epidemiology, health economics, and health care research. KORA was established in 1996 to expand the WHO (World Health Organization) MONICA (Monitoring of Trends and Determinants in Cardiovascular Disease) project in Augsburg. In the framework of MONICA, three independent cross-sectional population-representative surveys were conducted in 1984/85 (S1), 1989/90 (S2), and 1994/95 (S3) and a population-based acute myocardial infarction (AMI) registry was set up. The study subjects of all Augsburg MONICA and KORA surveys and the family studies on myocardial infarction and T2DM are of German nationality and were studied by physical examination, blood testing and a standardized interview in KORA study centers. All tests were carried out by specially trained personnel. Further details: (9-11).  Some individuals were originally recruited for two or more studies, but were assigned to one of the included KORA studies for the purpose of this joint analysis according to a priori defined criteria. These included higher priorities for families with discordant sibs and for studies where both investigated *IL6* SNPs have been genotyped. |
| --- | --- |
| MONICA /KORA Survey S3 | The MONICA/KORA Survey S3 originally investigated 4,856 individuals. Study participants that are included in the MONICA/KORA Case Cohort Study S123 were eliminated from subjects of the MONICA/KORA Survey S3 for this joint analysis. |
| KORA MI Family Study | Patients with myocardial infarction (MI) prior to the age of 60 years and their siblings were identified through the AMI. The diagnosis of MI was established according to the MONICA diagnostic criteria. Of 1,254 patients contacted, 609 agreed to participate in the study (532 men, aged 56.1 ± 0.3 years). Moreover, 540 siblings without MI (251 men, aged 54.6 ± 0.4 years from 325 families) were recruited and examined by the same protocol.  For the purpose of this joint analysis, the study was split in two parts. All for T2DM discordant sibships were included in the KORAMIFAM_DS study. Of the remaining families with T2DM individuals, one T2DM individual per family was chosen as case for the KORAMIFAM_CC study according to a priori defined criteria. Controls for the KORAMIFAM_CC study comprise one subject per family from families without T2DM individuals. |
| KORA Survey S4  (KORA S4) | The KORA S4 studied a population-representative sample of 4,261 subjects, 25–74 years old, during the years 1999–2001. The sample design followed the guidelines of the three previous MONICA Augsburg surveys. In the age-range of 55–74 years, 1,653 persons participated in an OGTT. Further details: (12).  The prevalent T2DM and the NGT-individuals of the OGTT-substudy were used in this joint analysis. The NGT-individuals of the KORA S4 were divided in two subgroups, to serve in the joint analysis as control group for both, the T2DM individuals of the KORA S4 (KORA-S4_CC; two controls per case randomly selected) and the unrelated T2DM individuals of the KORA-T2DMFAM (KORA-T2DMFAM_CC; the remainder of the controls). |

| KORA T2DM Family Study (KORA T2DMFAM) | In 2001 / 2002, 605 nuclear families were enrolled in the KORA T2DM Family Study. Families were ascertained through an index proband with known T2DM, who had at least one full sib or both parents willing to participate in the study. All available members of the index probands’ nuclear families, i.e. full sibs and parents, were included. Index probands were all from the city or region of Augsburg. They were recruited from T2DM patients of the Central Hospital of Augsburg, from earlier MONICA- and KORA-studies, from the AMI register or via public relations. All participants were living in Germany and all were of European origin. Most subjects were extensively phenotyped in the KORA study center, some were examined by their family doctor, who decided whether or not the subject had T2DM and took blood samples for DNA analyses.  For the purpose of this joint analysis, the study was split in two parts. All for T2DM discordant sibships were included in the KORA-T2DMFAM_DS study. Of the remaining families with T2DM individuals, one T2DM individual per family was chosen as case for the KORA-T2DMFAM_CC study according to a priori defined criteria (n = 351). Controls for the KORA-T2DMFAM_CC study comprise one subject per family from families without T2DM individuals (n = 13) and the randomly selected normoglycemic individuals of the KORA S4, that are not used in the KORA-S4_CC study (n = 406). |
| --- | --- |
| MONICA/ KORA Case Cohort Study S123 | The MONICA/KORA Case Cohort Study S123 was turned into a nested case-control study for the purpose of this joint analysis. All participants of at least one of the three MONICA Augsburg surveys were prospectively followed. The case cohort study was restricted to participants aged 35–74 years at baseline, since the incidence of T2DM is low in younger subjects. For the case-cohort study, a stratified random sample of the source population, containing 1,885 subjects, was selected. A total of 555 incident cases of T2DM were observed between participants’ study start dates and 31st of December 2002. Further details: (13). |
| Regensburg MI Family Study | The kindreds of the Regensburg MI Family Study were ascertained through myocardial infarction (MI) index patients, who were identified by screening 93,500 patient charts in seven cardiac in-hospital rehabilitation centers distributed throughout Germany. Index patients had all suffered from MI before 60 years. If at least one sibling had suffered from MI or had severe coronary artery disease or bypass surgery, the index patient with all available parents and siblings were contacted and invited to participate in the study. All participating individuals filled out a standardized questionnaire that focused on cardiovascular risk factors, medical diagnoses, life style and medication. Further details: (14).  For the purpose of this joint analysis, the study was split in two parts. All for T2DM discordant sibships were included in the RMIFAM_DS study. Of the remaining families with T2DM individuals, one T2DM individual per family was chosen as case for the RMIFAM_CC study according to a priori defined criteria. Controls for the RMIFAM_CC study were selected from families without T2DM individuals (one per family). |
| Second  Northwick Park Heart Study  (NPHS II) | For the NPHS II study 3012 unrelated healthy Caucasian middle-aged male subjects were recruited from nine general medical practices scattered throughout the UK and prospectively followed from 1989. Sixty-eight subjects with diabetes at baseline were excluded from analysis.  The participants of the NPHSII study were randomly divided in two equally sized subgroups, to serve in the joint analysis as control group for both, the EDSC and the UDACS study. Further details: (15). |

| Tarraco Study | For the Tarraco study 211 unrelated T2DM subjects were recruited from the outpatient clinic at Hospital Universitari de Tarragona “Joan XXIII” during the years 2000–2004. Simultaneously, 118 healthy subjects were recruited from the same hospital as control subjects. Further details: (7). |
| --- | --- |
| T2DM  Susceptibility in Pima  Indians Study | PIMA subjects were participants in ongoing longitudinal studies of T2DM conducted among members of the Gila River Indian Community in Arizona since 1965.  For the joint analysis, the family-based association study of sibships, which is robust to confounding by ethnic admixture or other sources of population stratification, was used. Further details: (7). |
| University College  Diabetes and Cardiovascular Study (UDACS) | The UDACS Study comprises 1,011 consecutive subjects recruited from the diabetes clinic at University College London Hospitals NHS Trust (UCLH) between the years 2001 and 2002. Patients completed a questionnaire with details of age, ethnicity, smoking habit, fasting status, duration of diabetes, and other clinical details. Blood was collected for plasma and DNA analysis. Several further parameters, such as BMI, were measured. No subjects requiring renal dialysis were recruited. Further details: (15).  As the NPHS II study of healthy male individuals serves as control group, only male UDACS subjects were included in this joint analysis. |

a The numbers presented for the original studies do not always match the numbers presented in table 1. The reason is that some subjects of the original studies were not included in the joint analysis because of study overlap, missing genotype data, missing T2DM status or because the sex- or age-range of cases and controls did not match according to the sample requirements described in the methods section.

**Table A4 – online appendix**

**Sensitivity analyses: Pooled ORs of association between *IL6* -174 C allele dominant**

**and T2DM**

| **Type of sensitivity  analysis** | **No. of Studies** | **No. of Cases  / Controls** | **OR  (95% CI)a** | **P Hetb** | **I2 [%]c** |
| --- | --- | --- | --- | --- | --- |
|  |  |  |  |  |  |

| **Studies included as in main analysis** d**, stratified by study type** | | | |  |  |
| --- | --- | --- | --- | --- | --- |
| Published studiese | 6 | 1,551 / 6,672 | 0.88 (0.76–1.01) | 0.61 | 0.0 |
| Unpublished studies | 12 | 3,195 / 9,558 | 0.93 (0.83–1.04) | 0.98 | 0.0 |
|  |  |  |  |  |  |
| Case-control studies | 14 | 4,140 / 15,720 | 0.91 (0.83–1.00) | 0.89 | 0.0 |
| Discordant-sib studies | 4 | 606 / 510 | 0.93 (0.53–1.63) | 0.97 | 0.0 |
|  |  |  |  |  |  |
| Originally T2DM study | 13 | 4,184 / 11,250 | 0.91 (0.82–1.00) | 0.82 | 0.0 |
| Originally not T2DM study f | 5 | 562 / 4,980 | 0.92 (0.75–1.12) | 1.00 | 0.0 |
|  |  |  |  |  |  |
| Studies with OGTTg | 8 | 3,254 / 6,602 | 0.90 (0.79–1.01) | 0.90 | 0.0 |
| Studies without OGTT | 10 | 1,492 / 9,628 | 0.93 (0.81–1.05) | 0.87 | 0.0 |
|  |  |  |  |  |  |
| Studies not enriched for MI | 12 | 3,699 / 13,731 | 0.91 (0.82–1.00) | 0.76 | 0.0 |
| Studies enriched for MIh | 6 | 1,047 / 2,499 | 0.92 (0.76–1.11) | 1.00 | 0.0 |
|  |  |  |  |  |  |
| **Studies included as in main analysis** d**, original data stratified by sex** | | | |  |  |
| Womeni | 13 | 1,852 / 6,330 | 0.91 (0.78–1.06) | 0.35 | 9.2 |
| Menj | 16 | 2,962 / 9,261 | 0.93 (0.83–1.05) | 0.39 | 5.5 |

a Fixed effect odds ratio estimate with 95% confidence interval, adjusted for age, sex and body mass index (BMI)

bP-value of Q-test for heterogeneity

c Measure of heterogeneity, can range between 0 and 100%

d All studies with controls in Hardy-Weinberg equilibrium (HWE), adjusted for age, sex and BMI

e The following studies are published: DANISH_CC, EPIC-POTSDAM_CC, GIRONA_CC, KORA-S4_CC, PIMA_DS, UDACS_CC

f The following studies originally were not designed as T2DM studies: CAPPP_CC, KORAMIFAM_CC, KORAMIFAM_DS, MONICA-S3_CC, RMIFAM_CC

g The following studies used an oral glucose tolerance test (OGTT) to exclude subjects with impaired glucose tolerance from the controls: BOTNIA_CC, DANISH_CC, FUSION_CC, FUSION_DS, GIRONA_CC, KORA-S4_CC, KORA-T2DMFAM_CC, KORA-T2DMFAM_DS

h The following studies are enriched for myocardial infarction (MI) patients: CAPPP_CC, KORAMIFAM_CC, KORAMIFAM_DS, KORA-T2DMFAM_CC, KORA-T2DMFAM_DS, RMIFAM_CC

i The following studies are not included because they comprise no or too few female participants: CAPPP_CC, EDSC_CC, GIRONA_CC, KORAMIFAM_DS, UDACS_CC

j The following studies are not included because they comprise too few male participants: KORAMIFAM_DS, PIMA_DS

**Table A5 – online appendix**

**Sensitivity analyses: Pooled ORs of association between *IL6* -573 C allele dominant and T2DM**

| **Type of sensitivity  analysis** | **No. of Studies** | **No. of Cases  / Controls** | **OR  (95% CI)a** | **P Hetb** | **I2 [%]c** |
| --- | --- | --- | --- | --- | --- |
|  |  |  |  |  |  |

| **Studies included as in main analysis**d**, stratified by study type** | | | | | |
| --- | --- | --- | --- | --- | --- |
| Case-control studiese | 7 | 2,076 / 9,007 | 1.06 (0.87–1.29) | 0.39 | 5.1 |
|  |  |  |  |  |  |
| Originally T2DM studyf | 6 | 2,198 / 5,735 | 1.03 (0.84–1.28) | 0.25 | 24.0 |
|  |  |  |  |  |  |
| Studies with OGTTg | 4 | 1,583 / 1,648 | 1.13 (0.84–1.51) | 0.24 | 28.2 |
| Studies without OGTT | 4 | 809 / 7,617 | 0.99 (0.77–1.27) | 0.56 | 0.0 |
|  |  |  |  |  |  |
| Studies not enriched for MI | 5 | 1,726 / 8,209 | 1.02 (0.82–1.27) | 0.23 | 29.2 |
| Studies enriched for MIh | 3 | 666 / 1,056 | 1.14 (0.75–1.76) | 0.67 | 0.0 |
|  |  |  |  |  |  |
| **Studies included as in main analysis**d**, original data stratified by sex** | | | | | |
| Womeni | 6 | 892 / 3,074 | 1.18 (0.85–1.63) | 0.49 | 0.0 |
| Men | 8 | 1,352 / 5,951 | 1.01 (0.79–1.28) | 0.56 | 0.0 |

a Fixed effect odds ratio estimate with 95% confidence interval, adjusted for age, sex and body mass index (BMI)

bP-value of Q-test for heterogeneity

c Measure of heterogeneity, can range between 0 and 100%

d All studies with controls in Hardy-Weinberg equilibrium (HWE), adjusted for age, sex and BMI

e KORA-T2DMFAM_DS is not included here, being the only discordant-sib study

f CAPPP_CC and MONICA-S3_CC are not included here, being the only studies which originally were not designed as T2DM studies

g The following studies used an oral glucose tolerance test (OGTT) to exclude subjects with impaired glucose tolerance (IGT) from the controls: BOTNIA_CC, KORA-S4_CC, KORA-T2DMFAM_CC, KORA-T2DMFAM_DS

h The following studies are enriched for myocardial infarction (MI) patients: CAPPP_CC, KORA-T2DMFAM_CC, KORA-T2DMFAM_DS

i The following studies are not included because they comprise no or too few female participants: CAPPP_CC, UDACS_CC

**Figure Legends – online appendix**

**Figure A1**

Funnel plot for the association between *IL6* -174G>C and T2DM. For each study, the odds ratio (OR) of the dominant model for the C allele, adjusted for age, sex and BMI, is plotted against the standard error of its log OR (SE(logOR)) as a measure of study precision. All studies with *IL6* -174G>C genotypes of control individuals in HWE, where the covariates age, sex and BMI are available, are included. Black circles represent published studies, white circles represent unpublished studies. The vertical line marks the pooled OR (0.91).

**Figure A2**

Sensitivity analysis for the association between **A** *IL6* -174G>C, or **B** *IL6* -573G>C and T2DM, dominant model for the C allele, adjusted for age, sex and BMI. Pooled fixed effect odds ratios (ORs) with 95% confidence intervals (95% CIs) are displayed for the main analysis (all studies in HWE with BMI available) and after alternate omission of individual studies. The addenda _CC and _DS behind the abbreviated study names denote case-control and discordant-sib studies, respectively. The studies are sorted according to the weight with which they contribute to the pooled OR estimate. The vertical line marks unity (1.0).

**Figures – online appendix**

**Figure A1 – online appendix**

*
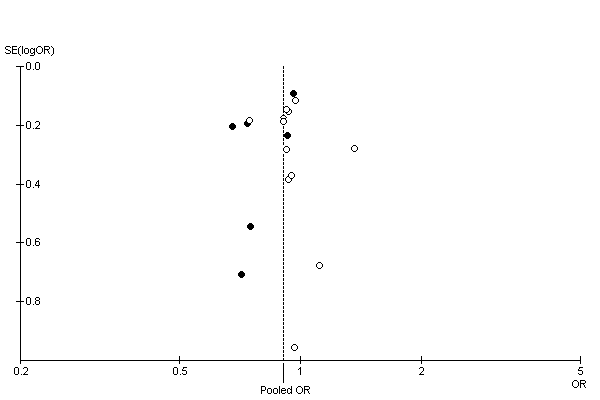
*

**Figure A2 A – online appendix**

**Figure A2 B – online appendix**

References

1. Wernstedt I, Eriksson AL, Berndtsson A, Hoffstedt J, Skrtic S, Hedner T, Hulten LM, Wiklund O, Ohlsson C, Jansson JO: A common polymorphism in the interleukin-6 gene promoter is associated with overweight. *Int J Obes Relat Metab Disord* 28:1272-1279, 2004

2. Hamid YH, Rose CS, Urhammer SA, Glumer C, Nolsoe R, Kristiansen OP, Mandrup-Poulsen T, Borch-Johnsen K, Jorgensen T, Hansen T, Pedersen O: Variations of the interleukin-6 promoter are associated with features of the metabolic syndrome in Caucasian Danes. *Diabetologia* 48:251-260, 2005

3. Flavell DM, Ireland H, Stephens JW, Hawe E, Acharya J, Mather H, Hurel SJ, Humphries SE: Peroxisome proliferator-activated receptor alpha gene variation influences age of onset and progression of type 2 diabetes. *Diabetes* 54:582-586, 2005

4. Mohlig M, Boeing H, Spranger J, Osterhoff M, Kroke A, Fisher E, Bergmann MM, Ristow M, Hoffmann K, Pfeiffer AF: Body mass index and C-174G interleukin-6 promoter polymorphism interact in predicting type 2 diabetes. *J Clin Endocrinol Metab* 89:1885-1890, 2004

5. Valle T, Tuomilehto J, Bergman RN, Ghosh S, Hauser ER, Eriksson J, Nylund SJ, Kohtamaki K, Toivanen L, Vidgren G, Tuomilehto-Wolf E, Ehnholm C, Blaschak J, Langefeld CD, Watanabe RM, Magnuson V, Ally DS, Hagopian WA, Ross E, Buchanan TA, Collins F, Boehnke M: Mapping genes for NIDDM. Design of the Finland-United States Investigation of NIDDM Genetics (FUSION) Study. *Diabetes Care* 21:949-958, 1998

6. Silander K, Mohlke KL, Scott LJ, Peck EC, Hollstein P, Skol AD, Jackson AU, Deloukas P, Hunt S, Stavrides G, Chines PS, Erdos MR, Narisu N, Conneely KN, Li C, Fingerlin TE, Dhanjal SK, Valle TT, Bergman RN, Tuomilehto J, Watanabe RM, Boehnke M, Collins FS: Genetic variation near the hepatocyte nuclear factor-4 alpha gene predicts susceptibility to type 2 diabetes. *Diabetes* 53:1141-1149, 2004

7. Vozarova B, Fernandez-Real JM, Knowler WC, Gallart L, Hanson RL, Gruber JD, Ricart W, Vendrell J, Richart C, Tataranni PA, Wolford JK: The interleukin-6 (-174) G/C promoter polymorphism is associated with type-2 diabetes mellitus in Native Americans and Caucasians. *Hum Genet* 112:409-413, 2003

8. Tsiavou A, Hatziagelaki E, Chaidaroglou A, Manginas A, Koniavitou K, Degiannis D, Raptis SA: TNF-alpha, TGF-beta1, IL-10, IL-6, gene polymorphisms in latent autoimmune diabetes of adults (LADA) and type 2 diabetes mellitus. *J Clin Immunol* 24:591-599, 2004

9. Wichmann HE, Gieger C, Illig T: KORA-gen - resource for population genetics, controls and a broad spectrum of disease phenotypes. *Gesundheitswesen* 67 Suppl 1:S26-S30, 2005

10. Holle R, Happich M, Lowel H, Wichmann HE: KORA - a research platform for population based health research. *Gesundheitswesen* 67 Suppl 1:S19-S25, 2005

11. Lowel H, Doring A, Schneider A, Heier M, Thorand B, Meisinger C: The MONICA Augsburg surveys - basis for prospective cohort studies. *Gesundheitswesen* 67 Suppl 1:S13-S18, 2005

12. Rathmann W, Haastert B, Icks A, Lowel H, Meisinger C, Holle R, Giani G: High prevalence of undiagnosed diabetes mellitus in Southern Germany: Target populations for efficient screening. The KORA survey 2000. *Diabetologia* 46:182-189, 2003

13. Thorand B, Kolb H, Baumert J, Koenig W, Chambless L, Meisinger C, Illig T, Martin S, Herder C: Elevated levels of interleukin-18 predict the development of type 2 diabetes: results from the MONICA/KORA Augsburg Study, 1984-2002. *Diabetes* 54:2932-2938, 2005

14. Broeckel U, Hengstenberg C, Mayer B, Holmer S, Martin LJ, Comuzzie AG, Blangero J, Nurnberg P, Reis A, Riegger GA, Jacob HJ, Schunkert H: A comprehensive linkage analysis for myocardial infarction and its related risk factors. *Nat Genet* 30:210-214, 2002

15. Stephens JW, Hurel SJ, Cooper JA, Acharya J, Miller GJ, Humphries SE: A common functional variant in the interleukin-6 gene is associated with increased body mass index in subjects with type 2 diabetes mellitus. *Mol Genet Metab* 82:180-186, 2004
